# Supplementary material for: Phylogenetic Co-Occurrence of ExoR, ExoS, and ChvI, Components of the RSI Bacterial Invasion Switch, Suggests a Key Adaptive Mechanism Regulating the Transition between Free-Living and Host-Invading Phases in Rhizobiales
Source: PubMed Central journal article supplement (PMC4550343; doi:10.1371/journal.pone.0135655), 2015-08-26

# Supplemental S1 Fig. Sell1 domains are characteristic of the ExoR homolog/ortholog data set.

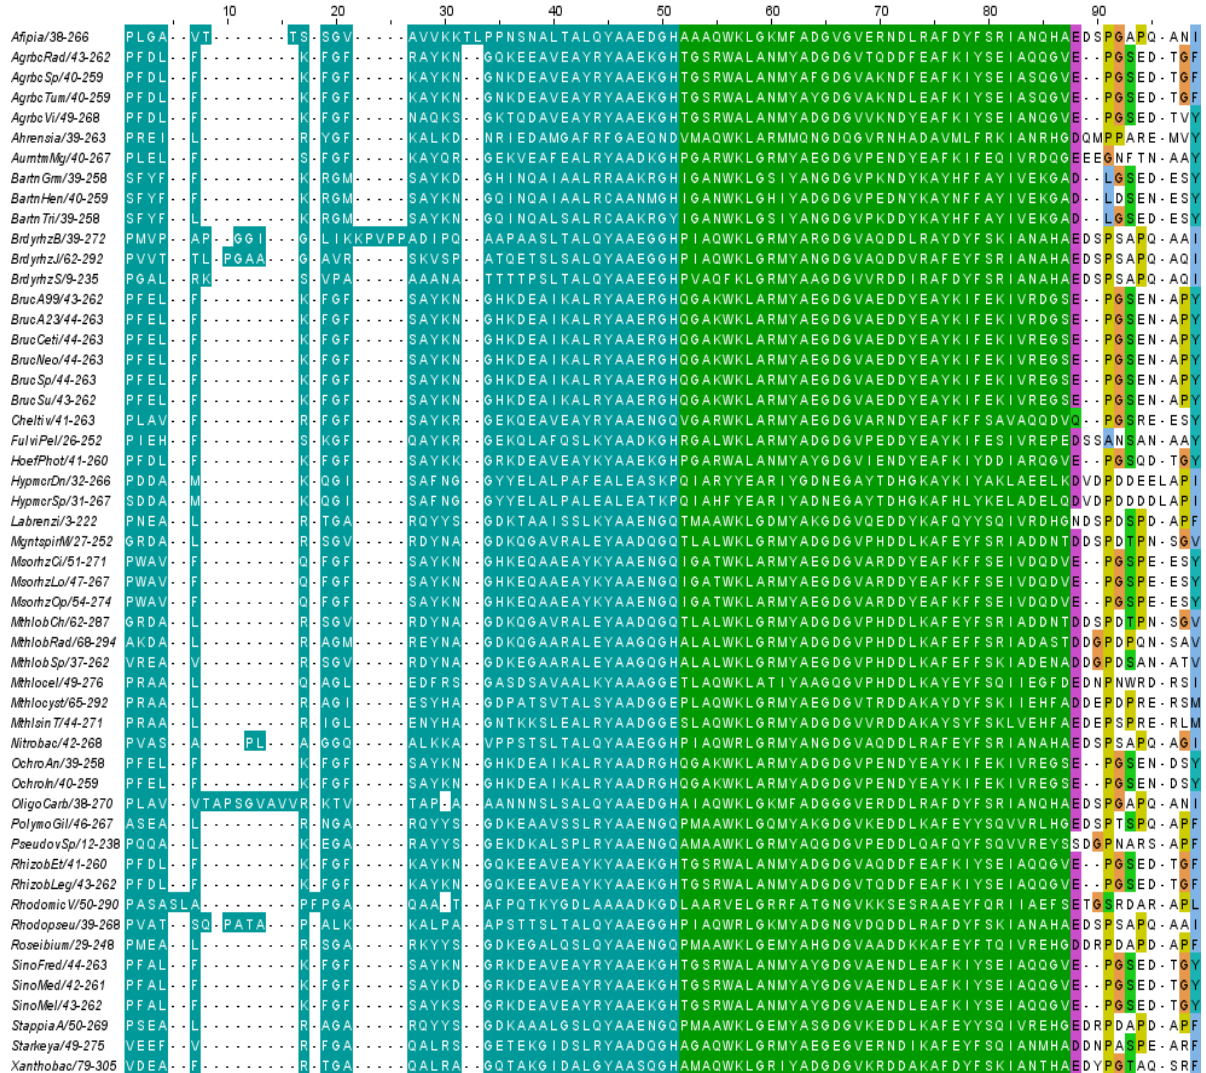

# Supplemental S1 Fig., continued.

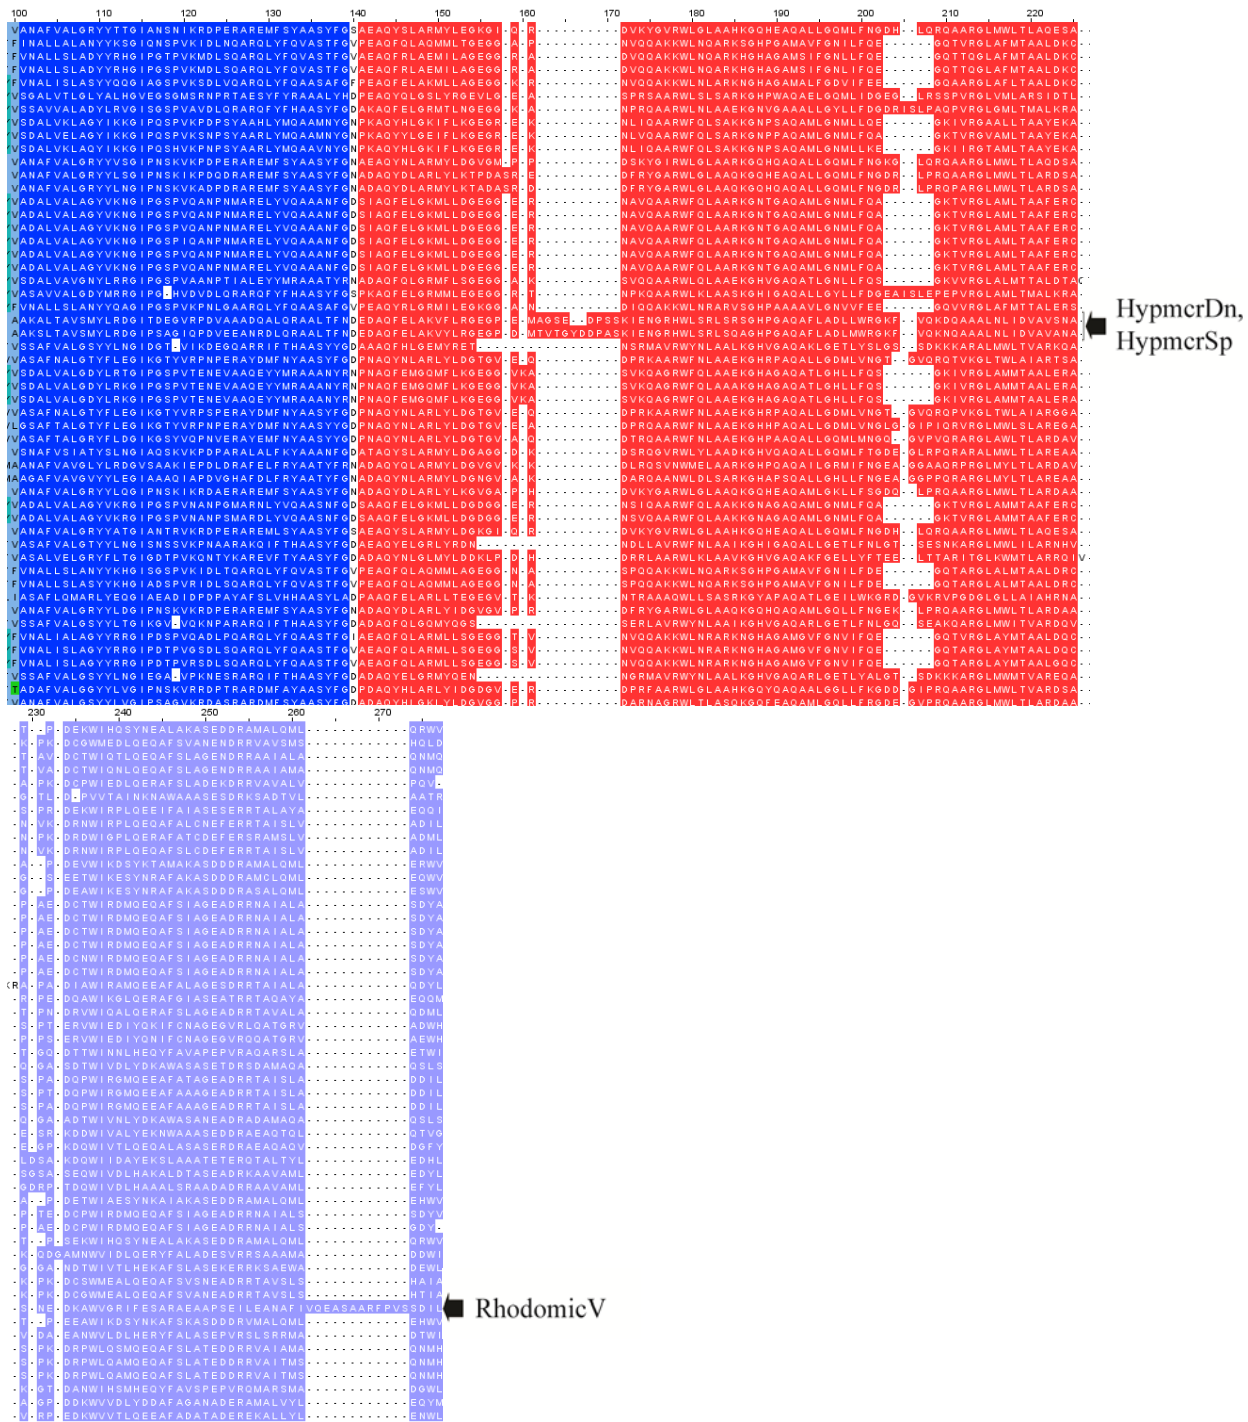

Supplement: pone.0135655.s001.pdf [file pone.0135655.s001.pdf]
