# Supplementary material for: Phylogenetic Co-Occurrence of ExoR, ExoS, and ChvI, Components of the RSI Bacterial Invasion Switch, Suggests a Key Adaptive Mechanism Regulating the Transition between Free-Living and Host-Invading Phases in Rhizobiales
Source: PubMed Central journal article supplement (PMC4550343; doi:10.1371/journal.pone.0135655), 2015-08-26

Mirrored comparison 1:  
ExoR (left) vs ExoS (right)

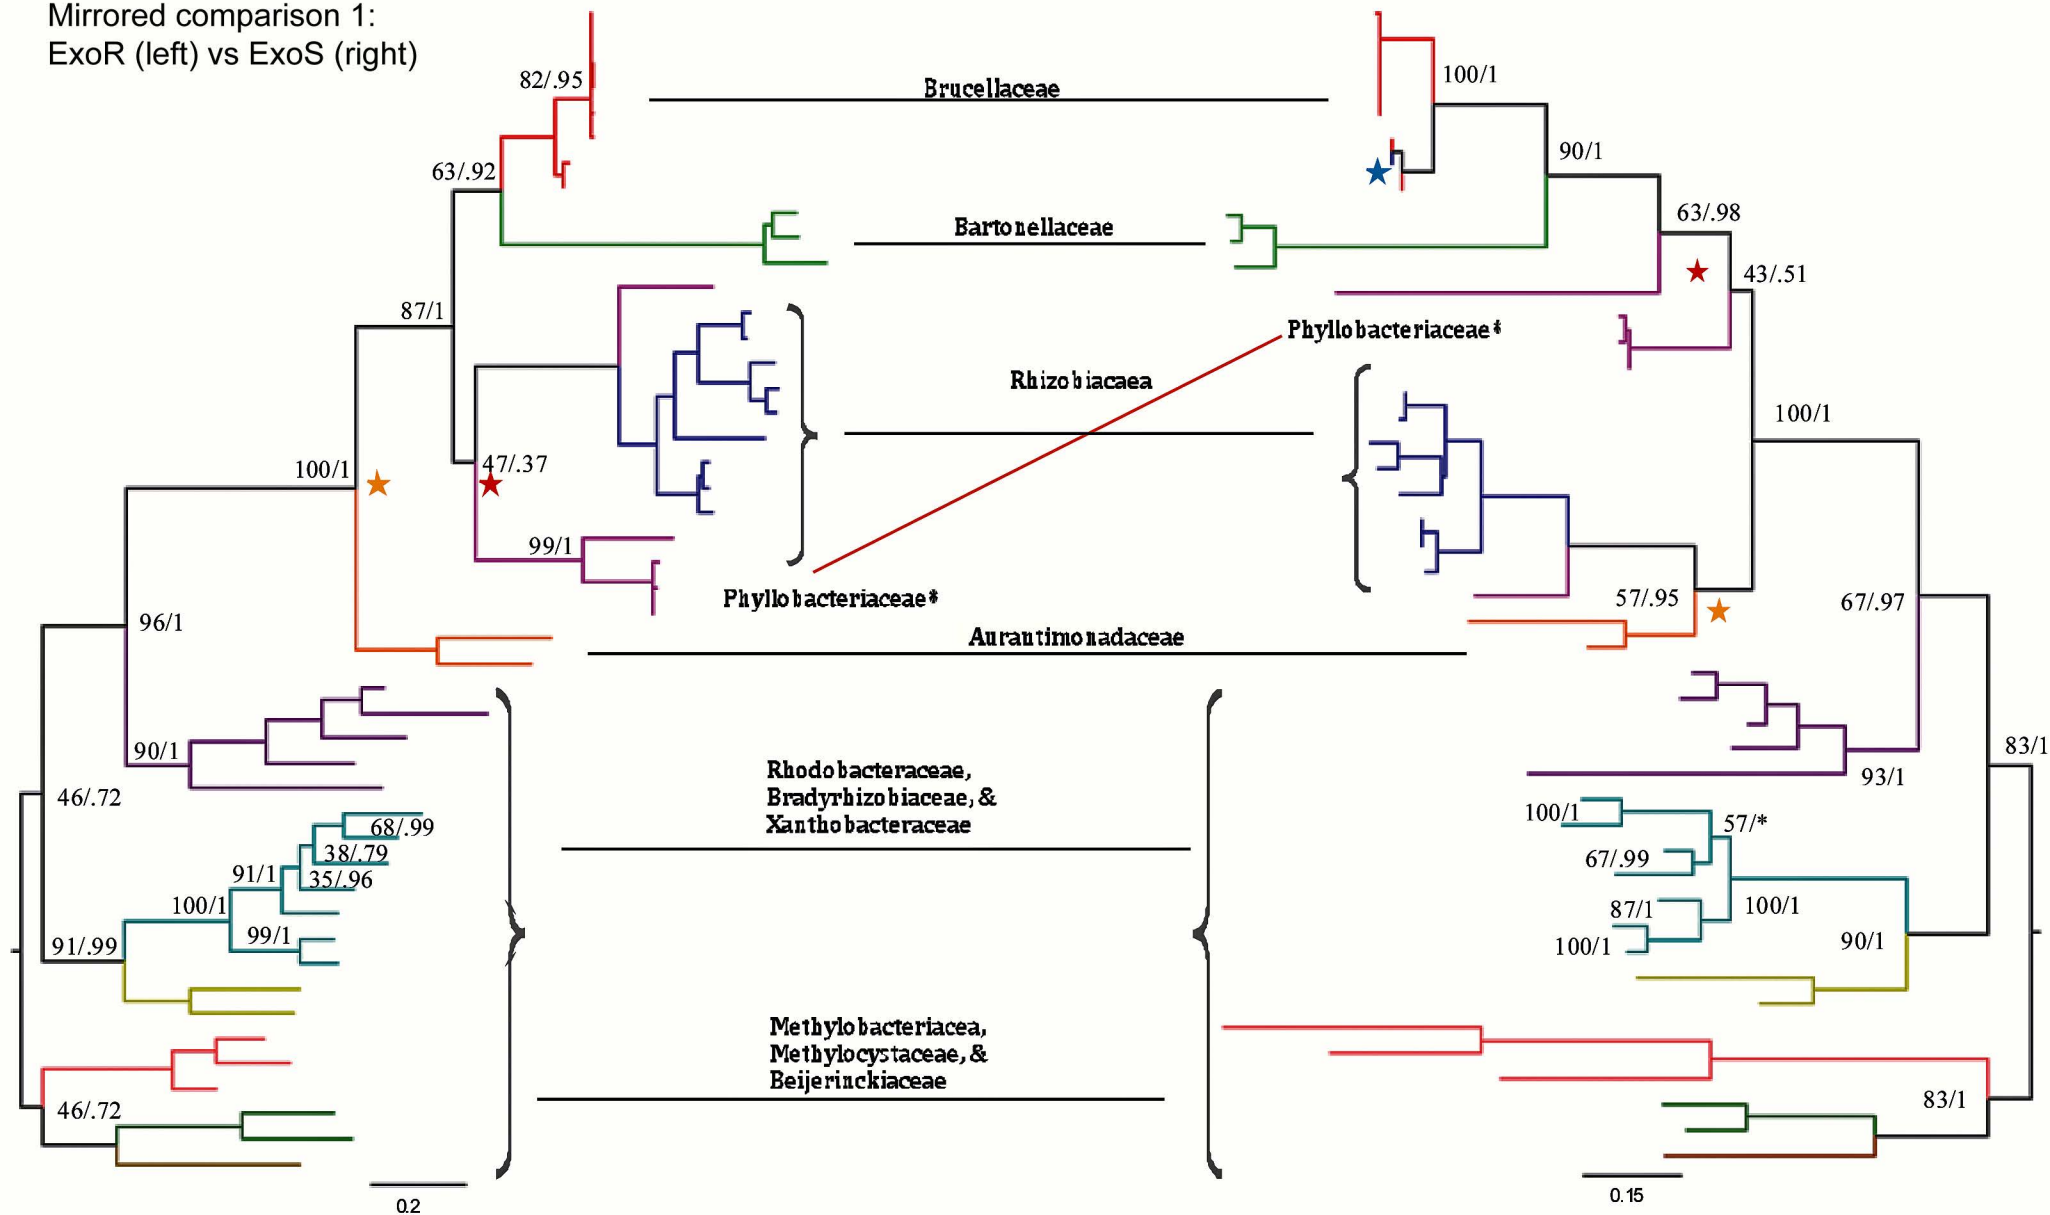

Mirrored comparison 2:  
ExoS (left) vs ChvI (right)

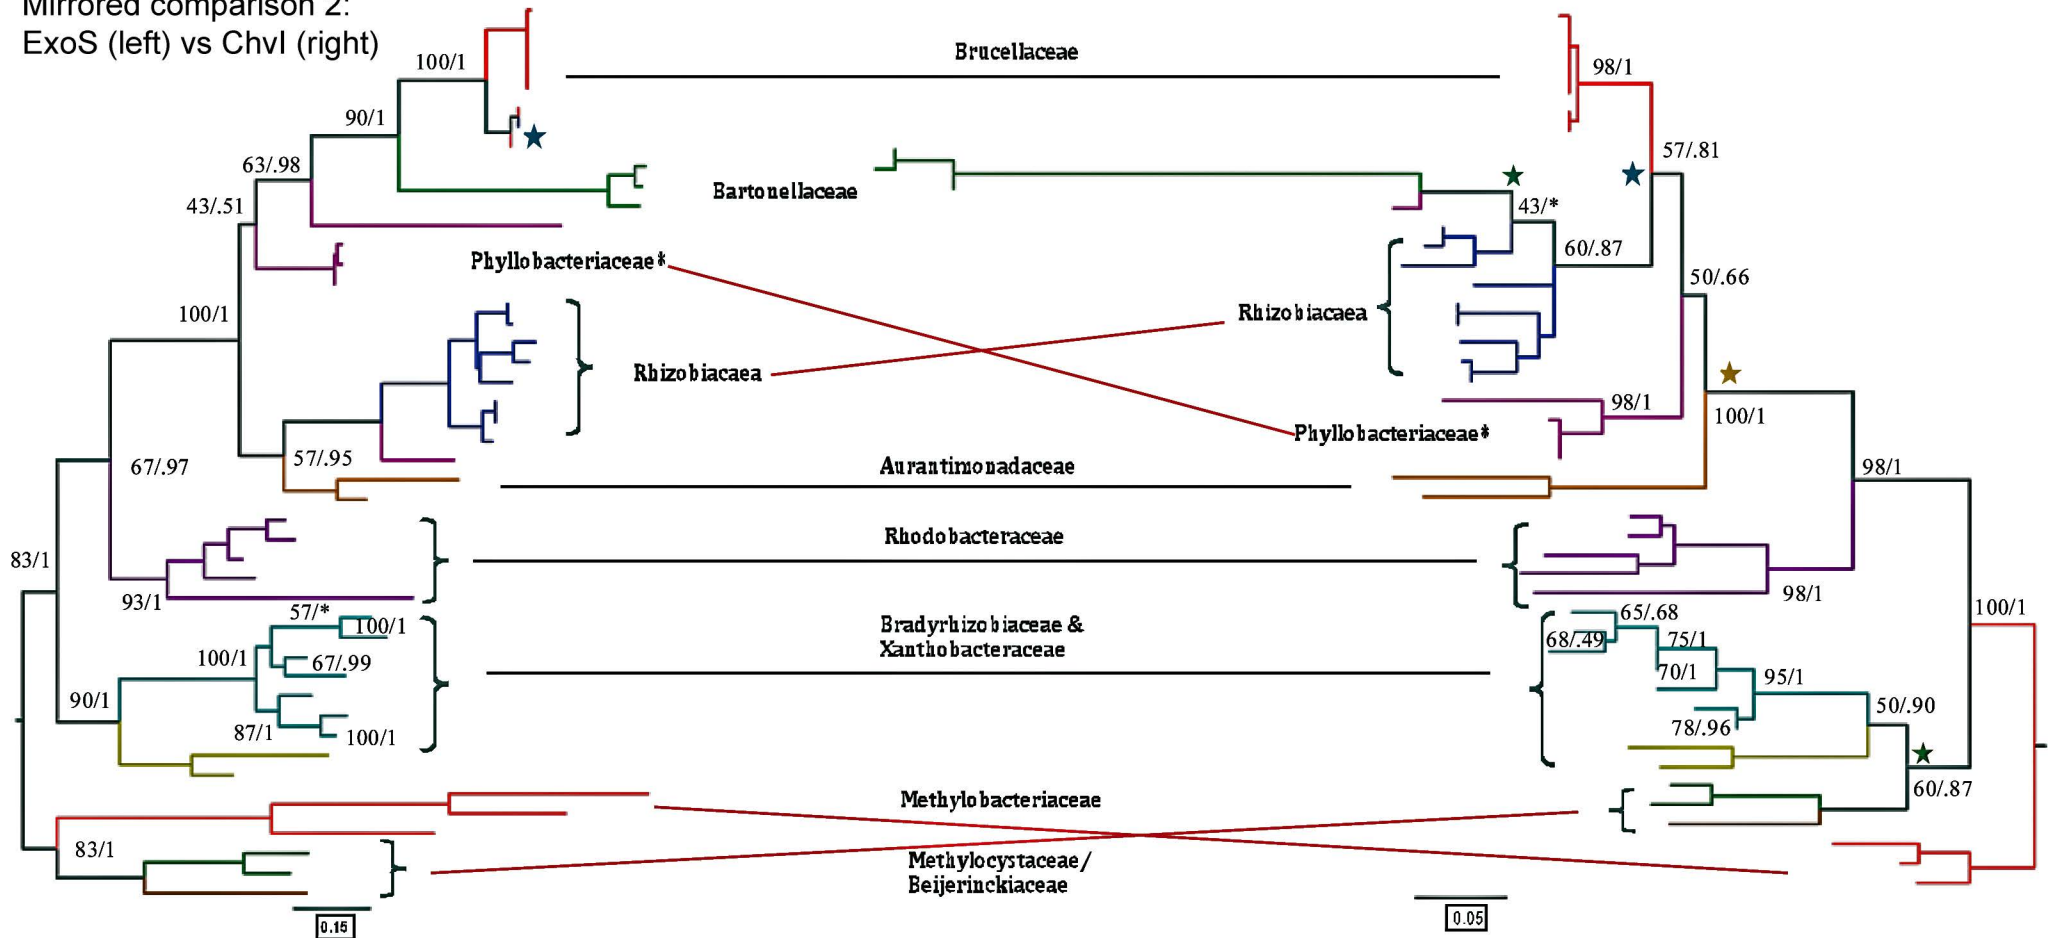

Supplement: pone.0135655.s003.pdf [file pone.0135655.s003.pdf]
