# Supplementary material for: Phylogenetic Co-Occurrence of ExoR, ExoS, and ChvI, Components of the RSI Bacterial Invasion Switch, Suggests a Key Adaptive Mechanism Regulating the Transition between Free-Living and Host-Invading Phases in Rhizobiales
Source: PubMed Central journal article supplement (PMC4550343; doi:10.1371/journal.pone.0135655), 2015-08-26
Supplement: pone.0135655.s005.pdf [file pone.0135655.s005.pdf]

| Column1                                                              | Column2          | Column3          | Column5           | Column6               | Column7                           | Column8                                      | Column9                                               | Column10              |
|----------------------------------------------------------------------|------------------|------------------|-------------------|-----------------------|-----------------------------------|----------------------------------------------|-------------------------------------------------------|-----------------------|
| Supplemental Table S2. Analysis of putative ExoR homologs            |                  |                  |                   |                       |                                   |                                              |                                                       |                       |
| Genome of origin, ExoR-like proteins                                 | Abbrev. in trees | Order            | Length (residues) | Reciprocal blast test | Sequence characterizations        | Signal peptide &/or localization predictions | TMH predictions (only positive predictions indicated) | # of Sel1 predictions |
| <b>Ortholog candidates</b>                                           |                  |                  |                   |                       |                                   |                                              |                                                       |                       |
| <i>Alfia.sp.1.NLS2</i>                                               | <i>Alfia</i>     | Rhizobiales      | 271               | Passes                |                                   | Yes                                          |                                                       | 4                     |
| <i>Agrobacterium.radiobacter.K84</i>                                 | <i>AgribcRad</i> | Rhizobiales      | 267               | Passes                |                                   | Yes                                          |                                                       | 2                     |
| <i>Agrobacterium.sp.H13-3</i>                                        | <i>AgribcSp</i>  | Rhizobiales      | 264               | Passes                |                                   | Yes                                          |                                                       | 4                     |
| <i>Agrobacterium.tumefaciens.str.C58</i>                             | <i>AgribcTu</i>  | Rhizobiales      | 264               | Passes                |                                   | Yes                                          |                                                       | 4                     |
| <i>Agrobacterium.vitis.S4</i>                                        | <i>AgribcVi</i>  | Rhizobiales      | 271               | Passes                |                                   | Yes                                          |                                                       | 4                     |
| <i>Aurantimonas.manganoxydans.SI85-9A1</i>                           | <i>AurmtmMg</i>  | Rhizobiales      | 278               | Passes                |                                   | Yes                                          |                                                       | 4                     |
| <i>Bartonella.grahamii.as4aup</i>                                    | <i>BartnGrm</i>  | Rhizobiales      | 263               | Passes                |                                   | Yes                                          |                                                       | 3                     |
| <i>Bartonella.henselae.str.Houston-1</i>                             | <i>BartnHen</i>  | Rhizobiales      | 264               | Passes                | Potential non-classical secretion | SP vs TMH: No consensus                      |                                                       | 5                     |
| <i>Bartonella.tribocorum.CIP.105476</i>                              | <i>BartnTri</i>  | Rhizobiales      | 264               | Passes                | Potential non-classical secretion | SP vs TMH: No consensus                      |                                                       | 3                     |
| <i>Bradyrhizobium.bacterium.SG-6C</i>                                | <i>BrdryrhzB</i> | Rhizobiales      | 277               | Passes                |                                   | Yes                                          |                                                       | 4                     |
| <i>Bradyrhizobium.japonicum.USDA.110</i>                             | <i>BrdryrhzJ</i> | Rhizobiales      | 297               | Passes                |                                   | Yes                                          |                                                       | 4                     |
| <i>Bradyrhizobium.sp.BTAi1</i>                                       | <i>BrdryrhzS</i> | Rhizobiales      | 240               | Passes                | Potential non-classical secretion | Yes                                          |                                                       | 4                     |
| <i>Brucella.abortus.bv.1.str.9-941 (REF)</i>                         | <i>BrucA99</i>   | Rhizobiales      | 267               | Passes                |                                   | Yes                                          |                                                       | 4                     |
| <i>Brucella.abortus.str.2308A</i>                                    | <i>BrucA23</i>   | Rhizobiales      | 268               | Passes                |                                   | Yes                                          |                                                       | 6                     |
| <i>Brucella.ceti.str.Cudo</i>                                        | <i>BrucCeti</i>  | Rhizobiales      | 268               | Passes                |                                   | Yes                                          |                                                       | 5                     |
| <i>Brucella.neotomae.5K33</i>                                        | <i>BrucNeo</i>   | Rhizobiales      | 268               | Passes                |                                   | Yes                                          |                                                       | 4                     |
| <i>Brucella.sp.B02</i>                                               | <i>BrucSp</i>    | Rhizobiales      | 268               | Passes                |                                   | Yes                                          |                                                       | 4                     |
| <i>Brucella.suis.1330 (REF)</i>                                      | <i>BrucSu</i>    | Rhizobiales      | 267               | Passes                |                                   | Yes                                          |                                                       | 4                     |
| <i>Chelativorans.sp.BNC1 (aka Agrobacterium.sp.BNC1)</i>             | <i>Cheltiv</i>   | Rhizobiales      | 268               | Passes                |                                   | Yes                                          |                                                       | 4                     |
| <i>Fulvmarina.pelagi.HTCC2506</i>                                    | <i>FulviPel</i>  | Rhizobiales      | 262               | Passes                |                                   | Weak SP predictions                          |                                                       | 4                     |
| <i>Hoeflea.phototrophica.DFL-43</i>                                  | <i>HoefPHot</i>  | Rhizobiales      | 265               | Passes                |                                   | Yes                                          |                                                       | 4                     |
| <i>Labrenzia.alexandrii.DFL-11</i>                                   | <i>LabrenzL</i>  | Rhodobacterales  | 238               | Passes                | Potential non-classical secretion | No                                           |                                                       | 4                     |
| <i>Mesorhizobium.ciceri.biovar.biserullae.WSM1271</i>                | <i>MsorzhCi</i>  | Rhizobiales      | 279               | Passes                |                                   | Yes                                          |                                                       | 4                     |
| <i>Mesorhizobium.loti.MAFF303099</i>                                 | <i>MsorzhLo</i>  | Rhizobiales      | 276               | Passes                |                                   | Yes                                          |                                                       | 4                     |
| <i>Mesorhizobium.opportunatum.WSM2075</i>                            | <i>MsorzhOp</i>  | Rhizobiales      | 283               | Passes                |                                   | Yes                                          |                                                       | 4                     |
| <i>Methylobacterium.chloromethanicum.CM4</i>                         | <i>MthlobCh</i>  | Rhizobiales      | 295               | Passes                |                                   | Yes                                          |                                                       | 4                     |
| <i>Methylobacterium.radiotolerans.JCM.2831</i>                       | <i>MthlobRad</i> | Rhizobiales      | 300               | Passes                |                                   | Yes                                          |                                                       | 4                     |
| <i>Methylobacterium.sp.4-46</i>                                      | <i>MthlobSp</i>  | Rhizobiales      | 269               | Passes                |                                   | Yes                                          |                                                       | 4                     |
| <i>Methylocella.silvestris.BL2</i>                                   | <i>Mthlocel</i>  | Rhizobiales      | 280               | Passes                |                                   | Yes                                          |                                                       | 4                     |
| <i>Methylocystis.sp.ATCC.49242</i>                                   | <i>Mthlocyst</i> | Rhizobiales      | 296               | Passes                |                                   | Yes                                          |                                                       | 4                     |
| <i>Methylosinus.trichosporium.OB3b</i>                               | <i>MthlsinT</i>  | Rhizobiales      | 275               | Passes                |                                   | Yes                                          |                                                       | 4                     |
| <i>Nitrobacter.hamburgensis.X14</i>                                  | <i>Nitrobac</i>  | Rhizobiales      | 273               | Passes                |                                   | Yes                                          |                                                       | 4                     |
| <i>Ochrobactrum.anthropi.ATCC.49188</i>                              | <i>OchroAn</i>   | Rhizobiales      | 263               | Passes                |                                   | Yes                                          |                                                       | 4                     |
| <i>Ochrobactrum.intermedium.LMG.3301</i>                             | <i>OchroIn</i>   | Rhizobiales      | 262               | Passes                |                                   | Yes                                          |                                                       | 4                     |
| <i>Oligotropha.carboxidovorans.OM5</i>                               | <i>OliboCarb</i> | Rhizobiales      | 275               | Passes                |                                   | Yes                                          |                                                       | 4                     |
| <i>Polymorphum.gilvum.SL003B-26A1</i>                                | <i>PolymoGil</i> | Rhodobacterales  | 280               | Passes                |                                   | Yes                                          |                                                       | 2                     |
| <i>Pseudovibrio.sp.E062</i>                                          | <i>PseudovSp</i> | Rhodobacterales  | 249               | Passes                | Potential non-classical secretion | No                                           |                                                       | 2                     |
| <i>Rhizobium.ethi.CFN.42</i>                                         | <i>RhizobEt</i>  | Rhizobiales      | 265               | Passes                |                                   | Yes                                          |                                                       | 4                     |
| <i>Rhizobium.leguminosarum.bv.trifolii.WSM1325</i>                   | <i>RhizobLeg</i> | Rhizobiales      | 267               | Passes                |                                   | Yes                                          |                                                       | 4                     |
| <i>Rhodospseudomonas.palustris.CGA009 (REF)</i>                      | <i>Rhodopseu</i> | Rhizobiales      | 273               | Passes                |                                   | Yes                                          |                                                       | 4                     |
| <i>Roseibium.sp.TrichSKD4</i>                                        | <i>Roseibium</i> | Rhodobacterales  | 266               | Passes                |                                   | Boarderline SP predictions                   |                                                       | 2                     |
| <i>Sinorhizobium.fredii.NGR234</i>                                   | <i>SinoFred</i>  | Rhizobiales      | 268               | Passes                |                                   | Yes                                          |                                                       | 4                     |
| <i>Sinorhizobium.medicinae.WSM419</i>                                | <i>SinoMed</i>   | Rhizobiales      | 267               | Passes                |                                   | Yes                                          |                                                       | 4                     |
| <i>Sinorhizobium.melioloti.1021</i>                                  | <i>SinoMel</i>   | Rhizobiales      | 268               | N/A                   |                                   | Yes                                          |                                                       | 4                     |
| <i>Stappia.aggregata.IAM12614 (aka Labrenzia.aggregata.IAM12614)</i> | <i>LabrenzA</i>  | Rhodobacterales  | 285               | Passes                |                                   | SP                                           |                                                       | 4                     |
| <i>Starkeya.novella.DSM.506</i>                                      | <i>Starkeya</i>  | Rhizobiales      | 279               | Passes                |                                   | SP                                           |                                                       | 2                     |
| <i>Xanthobacter.autotrophicus.Py2</i>                                | <i>Xanthobac</i> | Rhizobiales      | 310               | Passes                |                                   | Boarderline                                  | Boarderline                                           | 4                     |
| <b>Outlying structural or localization predictions</b>               |                  |                  |                   |                       |                                   |                                              |                                                       |                       |
| <i>Azorhizobium.caulinodans.ORS.571</i>                              |                  | Rhizobiales      | 351               | Passes                |                                   | No                                           | TMH prediction                                        | 4                     |
| <i>Beijerinckia.indica.subsp.indica.ATCC.9039</i>                    |                  | Rhizobiales      | 342               | Passes                |                                   | No                                           | TMH prediction                                        | 3                     |
| <i>Novosphingobium.aromaticivorans.DSM12444</i>                      |                  | Sphingomonadales | 432               | Passes                | SPOR domain (PF05036)             | No                                           | Weak TMH prediction                                   | 2                     |
| <i>Parvibaculum.lavamentivorans.DS-1</i>                             |                  | Rhizobiales      | 278               | Passes                |                                   | No                                           | TMH prediction                                        | 4                     |
| <i>Pelagibacterium.halotolerans.B2</i>                               |                  | Rhizobiales      | 382               | Passes                |                                   | No                                           | Weak TMH prediction                                   | 2                     |
| <b>Phylogenetically non-resolvable with current methods</b>          |                  |                  |                   |                       |                                   |                                              |                                                       |                       |
| <i>Ahrensia.sp.RZA130</i>                                            |                  | Rhodobacterales  | 287               | Passes                |                                   | Yes                                          | Weak TMH prediction                                   | 4                     |
| <i>Hyphomicrobium.dentrificans.ATCC.51888</i>                        |                  | Rhizobiales      | 370               | Passes                |                                   | Yes                                          |                                                       | 0                     |
| <i>Hyphomicrobium.sp.MC1</i>                                         |                  | Rhizobiales      | 339               | Passes                |                                   | Yes                                          |                                                       | 3                     |
| <i>Magnetospirillum.magnetotacticum.MS-1</i>                         |                  | Rhodospirillales | 260               | Passes                | Potential non-classical secretion | No                                           |                                                       | 4                     |
| <i>Rhodomicrobium.vannielii.ATCC71100</i>                            |                  | Rhizobiales      | 391               | Passes                |                                   | Boarderline                                  | Weak TMH prediction                                   | 4                     |
| <b>Non-orthologous</b>                                               |                  |                  |                   |                       |                                   |                                              |                                                       |                       |
| <i>Acetobacter.pasteurianus.IFO3283-01 (REF)</i>                     |                  | Rhodospirillales | 590               | Fails                 | Putative PodJL                    | No                                           |                                                       | 7                     |
| <i>Asticca.aulis.excentricus.CB_48</i>                               |                  | Caulobacterales  | 497               | Fails                 | Putative PodJL                    | No                                           |                                                       | 7                     |
| <i>Asticca.aulis.excentricus.CB_48</i>                               |                  | Caulobacterales  | 417               | Fails                 | Putative PodJL                    | No                                           |                                                       | 4                     |
| <i>Azospirillum.brasiliense.Sp245</i>                                |                  | Rhodospirillales | 567               | Fails                 | Putative $\beta$ -lactamase       | No                                           |                                                       | 13                    |
| <i>Azospirillum.lipoferum.4B</i>                                     |                  | Rhodospirillales | 450               | Fails                 | Putative PodJL ortholog           | No                                           |                                                       | 6                     |
| <i>Azospirillum.sp.B510</i>                                          |                  | Rhodospirillales | 452               | Fails                 | Putative PodJL ortholog           | No                                           |                                                       | 6                     |
| <i>Gluconacetobacter.hansenii.ATCC.23769</i>                         |                  | Rhodospirillales | 606               | Fails                 |                                   | No                                           |                                                       | 7                     |
| <i>Gluconacetobacter.diazotrophicus.PA1_5</i>                        |                  | Rhodospirillales | 593               | Fails                 |                                   |                                              |                                                       | 12                    |
| <i>Gluconacetobacter.diazotrophicus.PA1_5</i>                        |                  | Rhodospirillales | 593               | Fails                 |                                   |                                              |                                                       | 11                    |
| <i>Gluconacetobacter.europaeus.LMG18494</i>                          |                  | Rhodospirillales | 594               | Fails                 |                                   | No SP consensus                              |                                                       | 8                     |
| <i>Gluconacetobacter.xylinus.NBR3288</i>                             |                  | Rhodospirillales | 595               | Fails                 |                                   |                                              |                                                       | 11                    |
| <i>Gluconobacter.oxydans.621H</i>                                    |                  | Rhodospirillales | 590               | Fails                 |                                   | No SP consensus                              |                                                       | 8                     |
| <i>Granulibacter.bethesdensis.CGNH1</i>                              |                  | Rhodospirillales | 652               | Fails                 |                                   | No SP consensus                              |                                                       | 9                     |
| <i>Hyphomicrobium.sp.MC1</i>                                         |                  | Rhizobiales      | 360               | Fails                 |                                   |                                              |                                                       | 4                     |
| <i>Hyphomicrobium.sp.MC1</i>                                         |                  | Rhizobiales      | 384               | Fails                 |                                   |                                              |                                                       | 5                     |
| <i>Magnetococcus.marinus.MC-1</i>                                    |                  | Magnetococcales  | 831               | Fails                 |                                   | No SP consensus                              |                                                       | 14                    |
| <i>Magnetococcus.marinus.MC-1</i>                                    |                  | Magnetococcales  | 976               | Fails                 |                                   | No SP consensus                              |                                                       | 12                    |
| <i>Magnetospirillum.gryphiswaldense.MSR-1</i>                        |                  | Rhodospirillales | 471               | Fails                 |                                   |                                              |                                                       | 8                     |
| <i>Magnetospirillum.magneticum.AMB-1</i>                             |                  | Rhodospirillales | 393               | Fails                 | Putative PodJL ortholog           |                                              |                                                       | 6                     |
| <i>Maricaulis.maris.MCS10</i>                                        |                  | Rhodobacterales  | 401               | Fails                 |                                   |                                              |                                                       | 4                     |
| <i>Maricaulis.maris.MCS10</i>                                        |                  | Rhodobacterales  | 1072              | Fails                 | PG_binding_1 domain (PF01471)     | No                                           |                                                       | 3                     |
| <i>Octadecabacter.arcticus.238</i>                                   |                  | Rhodobacterales  | 455               | Fails                 | Potential non-classical secretion | No                                           |                                                       | 4                     |
| <i>Parvularcula.bermudensis.HTCC2503</i>                             |                  | Parvularculales  | 411               | Fails                 |                                   |                                              |                                                       | 6                     |
| <i>Rhodobacter.sphaeroides.2.4.1 (REF)</i>                           |                  | Rhodobacterales  | 971               | Fails                 | Peptidase_C14 domain (PF00656)    |                                              |                                                       | 9                     |
| <i>Rhodobacter.sphaeroides.ATCC.17025</i>                            |                  | Rhodobacterales  | 400               | Fails                 |                                   | No                                           | TMH prediction                                        | 5                     |
| <i>Rhodomicrobium.vannielii.ATCC71100</i>                            |                  | Rhizobiales      | 598               | Fails                 | Possibly not secreted             |                                              |                                                       | 9                     |
| <i>Rhodospirillum.photometricum.DSM1122</i>                          |                  | Rhodospirillales | 262               | Fails                 |                                   | No                                           |                                                       | 7                     |
| <i>Rickettsia bellii OSU 85-389</i>                                  |                  | Rickettsiales    | 1359              | Fails                 |                                   |                                              |                                                       | 5                     |

|                                                                 |                  |     |       |                                                          |  |    |
|-----------------------------------------------------------------|------------------|-----|-------|----------------------------------------------------------|--|----|
| <a href="#">Roseobacter.sp.SK209-2-6</a>                        | Rhodobacterales  | 782 | Fails | Peptidase_C14 (PF00656) & PG_binding_1 (PF01471) domains |  | 6  |
| <a href="#">Sphingobium.chlorophenicum.L-1</a>                  | Sphingomonadales | 261 | Fails | Putative PodJL ortholog                                  |  | 4  |
| <a href="#">Sphingobium.japonicum.IT265</a>                     | Sphingomonadales | 345 | Fails | SPOR domain (PF05036)                                    |  | 2  |
| <a href="#">Sphingobium.sp.SVK-6</a>                            | Sphingomonadales | 357 | Fails | SPOR domain (PF05036)                                    |  | 2  |
| <a href="#">Sphingopyxis.alaskensis.RB2256</a>                  | Sphingomonadales | 396 | Fails | SPOR domain (PF05036)                                    |  | 2  |
| <a href="#">Sphingomonas.wittichii.RW1</a>                      | Sphingomonadales | 250 | Fails |                                                          |  | 4  |
| <a href="#">Zymomonas.mobilis.subsp.mobilis.ATCC10988 (REF)</a> | Sphingomonadales | 455 | Fails |                                                          |  | 11 |

Notes: CSD = Cat-scratch disease
